# Supplementary material for: Extensively Drug-resistant Tuberculosis, Italy and Germany
Source: PubMed Central journal article supplement (PMC2738462; doi:10.3201/eid1305.060200), 2007-05
Supplement: 007-0200_appT-s1.pdf [file 007-0200_appT-s1.pdf]

Appendix Table. XDR TB patient characteristics, Italy and Germany, 2003–2006\*

| Age (y), sex | Country      |            | Radiologic cavities, thorax† | No. treatment periods‡ | Drugs received§                                                   | Drug resistance†§                                                 | Hospitalization, d | Smear conversion, d | Culture conversion, d | Treatment duration, mo | Outcome¶ |
|--------------|--------------|------------|------------------------------|------------------------|-------------------------------------------------------------------|-------------------------------------------------------------------|--------------------|---------------------|-----------------------|------------------------|----------|
|              | Of diagnosis | Of birth   |                              |                        |                                                                   |                                                                   |                    |                     |                       |                        |          |
| 40, M        | Italy        | Italy      | Bilateral                    | 3                      | S, R, H, E, Z; Rb                                                 | S, R, H, E, Z; FQ, AK, Cyc                                        | 220                | –                   | –                     | 73                     | Improved |
| 61, F        | Italy        | Peru       | Monolateral                  | 1                      | S, R, H, E, Z; FQ, Eth, Ak, PAS, Cyc                              | S, R, H, E, Z; FQ, AK, Cyc                                        | 83                 | –                   | –                     | 16                     | Died     |
| 27, F        | Italy        | Moldova    | Monolateral                  | 3                      | S, R, H, E, Z; FQ Eth AK, PAS, K, Cyc, Clof                       | S, R, H, Z; FQ, Eth, K                                            | 406                | 300                 | 300                   | 10                     | Improved |
| 46, M        | Italy        | Senegal    | Bilateral                    | 4                      | S, R, H, E, Z; FQ, PAS, Cyc                                       | S, R, H, Z; FQ, Eth, AK, PAS                                      | 69                 | 49                  | 35                    | 6                      | Improved |
| 43, F        | Italy        | Italy      | Bilateral                    | 3                      | S, R, H, E, Z; FQ, Eth, AK, PAS, C, K, Cyc, Rb, Clof, Dap, Cl, Th | S, R, H, E, Z; FQ, Eth, AK, PAS, C, K, Cyc, Rb, Clof              | 422                | –                   | –                     | 94                     | Died     |
| 38, F        | Italy        | Italy      | Bilateral                    | 3                      | S, R, H, E, Z; FQ, Eth, PAS, C, Cyc                               | S, R, H, E, Z; FQ, AK, PAS, Cyc                                   | 80                 | –                   | –                     | 12                     | Died     |
| 49, F        | Italy        | Italy      | Bilateral                    | 3                      | S, R, H, E, Z; FQ, Eth, AK, PAS, C, K, Cyc, Rb, Clof, Dap, Cl, Th | S, R, H, E, Z; FQ, Eth, AK, PAS, C, K, Cyc, Rb, Clof, Dap, Cl, Th | 625                | –                   | –                     | 60                     | Died     |
| 33, M        | Germany      | Uzbekistan | Monolateral                  | 2                      | S, R, H, E, Z                                                     | S, R, H, E, Z; FQ, Eth, AK, C, Rb                                 | 120                | –                   | –                     | 4                      | Improved |
| 29, M        | Germany      | Uzbekistan | Bilateral                    | 2                      | S, R, H, E, Z; Rb                                                 | S, R, H, E, Z; FQ, C                                              | 240                | 180                 | 160                   | 12                     | Improved |
| 52, M        | Germany      | Azerbaijan | Monolateral                  | >1                     | Not available                                                     | S, R, H, E, Z; FQ, AK, PAS, C, Cyc, Rb                            | 140                | 7                   | 35                    | 6                      | Improved |
| 36, F        | Italy        | Romania    | Bilateral                    | 4                      | S, R, H, E, Z; FQ, Eth, PAS, Cyc, Rb                              | R, H, Z; FQ, AK, Rb                                               | 248                | 110                 | –                     | 28                     | Improved |

\*XDR TB, extensively drug-resistant tuberculosis; –, not achieved. All patients were HIV seronegative.

†At time of XDR TB diagnosis.

‡Treatment periods >30 d.

§First-line drugs: S, streptomycin; R, rifampin; H, isoniazid; E, ethambutol; Z, pyrazinamide; second-line drugs: FQ, fluoroquinolone; Eth, ethionamide; AK, amikacin; PAS, para-aminosalicylic acid;

C, capreomycin; K, kanamycin; Cyc, cycloserine; other drugs: Rb, rifabutin; Clf, clofazimine; Dap, dapsone; Cl, clarithromycin; Th, thiacetazone.  
¶Improved, achieved bacteriologic conversion, radiologic and clinical improvement, or both.
